# Supplementary material
Source: ML conference proceedings conference paper supplement (https://proceedings.mlr.press/v189/ghiassi23a.html)
Supplement: Supplementary file [file ghiassi23a-supp.pdf]

## Supplementary Material: Multi Label Loss Correction against Missing and Corrupted Labels

**Amirmasoud Ghiassi**

*Delft University of Technology, Delft, Netherlands*

S.GHIASSI@TUDELFT.NL

**Robert Birke**

*Computer Science dept., University of Turin, Turin, Italy*

ROBERT.BIRKE@UNITO.IT

**Lydia Y.Chen**

*Delft University of Technology, Delft, Netherlands*

LYDIAYCHEN@IEEE.ORG

**Editors:** Emtiyaz Khan and Mehmet Gönen

### Combining MLLSC with ASL loss function

MLLSC can be easily integrated into different types of multi-label loss functions. Here we provide the resulting loss function for MLLSC + ASL (Ridnik et al., 2021). ASL is an asymmetric multi-label loss which weights positive and negative labels differently (see Eq.4 in the main paper). We define MLLSC combined with ASL as

$$\begin{cases} \mathcal{L}_k^+ = \mathbb{1}(p_k > \tau) (1 - \mathcal{P}'_{k,m})^{\gamma_+} \log(\mathcal{P}'_{k,m}) + (1 - \mathbb{1}(p_k > \tau)) \mathcal{P}'_{k,m}{}^{\gamma_-} \log(1 - \mathcal{P}'_{k,m}) \\ \mathcal{L}_k^- = \mathbb{1}(p_k < \tau') \mathcal{P}'_{k,m}{}^{\gamma_-} \log(1 - \mathcal{P}'_{k,m}) + (1 - \mathbb{1}(p_k < \tau')) (1 - \mathcal{P}'_{k,m})^{\gamma_+} \log(\mathcal{P}'_{k,m}) \end{cases} \quad (1)$$

where  $\gamma_+$  and  $\gamma_-$  are the focus parameters for positive and negative labels, and  $\mathcal{P}'_{k,m} = \max(p_k - m, 0)$  is the marginal probability with tunable hyper-parameter  $m$ . Besides,  $\mathbb{1}(\cdot)$  is an indicator function. We set  $\gamma_- = 4$ ,  $\gamma_+ = 2$  and  $m = 1$  according to the default values in (Ridnik et al., 2021).

### References

Tal Ridnik, Emanuel Ben Baruch, Nadav Zamir, Asaf Noy, Itamar Friedman, Matan Protter, and Lihi Zelnik-Manor. Asymmetric loss for multi-label classification. In *ICCV*, pages 82–91. IEEE, 2021.
